# Supplementary material for: A nuclear-based quality control pathway for non-imported mitochondrial proteins
Source: eLife. 2021 Mar 18;10:e61230. doi: 10.7554/eLife.61230 (PMC7993989; doi:10.7554/eLife.61230)
Supplement: Supplementary file 1. [file elife-61230-supp1.xlsx]

## Sheet: Sheet1
ORF Name	Common Name	Detectable by Microscopy in Mitochondria of Untreated Cells	Detectable by Western Blot Untreated	Western Blot Abundance Change with FCCP Treatment	Level of Abundance Change via Western	Final Category with FCCP Treatment	Class
YKL114C	APN1	Yes	Yes	Up	small	Nucleus	1
YLR059C	REX2	Yes	Yes	Up	small	Nucleus	1
YMR072W	ABF2	Yes	Yes	Up	small	Nucleus	1
YDR070C	FMP16	Yes	Yes	Up	small	Nucleus	1
YDR148C	KGD2	Yes	Yes	unchanged		Nucleus	1
YKL194C	MST1	Yes	Yes	unchanged		Nucleus	1
YER178W	PDA1	Yes	Yes	unchanged		Nucleus	1
YKL085W	MDH1	Yes	Yes	unchanged		Nucleus	1
YLR132C	USB1	Yes	yes	unchanged		Nucleus	1
YMR286W	MRPL33	Yes	Yes	unchanged		Nucleus	1
YLL041C	SDH2	Yes	Yes	unchanged		Nucleus	1
YDR258C	HSP78	yes	Yes	down	small	Nucleus	1
YDL164C	CDC9	Yes	Yes	down	small	Nucleus	1
YMR108W	ILV2	Yes	Yes	down	small	Nucleus	1
YPL083C	SEN54	Yes	Yes	down	small	Nucleus	1
YGR244C	LSC2	Yes	Yes	down	small	Nucleus	1
YBR221C	PDB1	Yes	Yes	down	small	Nucleus	1
YOR142W	LSC1	Yes	Yes	down	small	Nucleus	1
YOR158W	PET123	Yes	Yes	down	small	Nucleus	1
YML025C	YML6	Yes	Yes	down	small	Nucleus	1
YCL009C	ILV6	Yes	Yes	down	small	Nucleus	1
YOR176W	HEM15	Yes	Yes	down	small	Nucleus	1
YJR016C	ILV3	Yes	Yes	down	large	Nucleus	1
YDL174C	DLD1	Yes	Yes	down	large	Nucleus	1
YDL178W	DLD2	Yes	Yes	down	large	Nucleus	1
YFL018C	LPD1	Yes	Yes	down	large	Nucleus	1
YOL140W	ARG8	Yes	Yes	down	large	Nucleus	1
YPL118W	MRP51	Yes	Yes	down	large	Nucleus	1
YML120C	NDI1	Yes	Yes	Up	small	Mitochondria	2
YPR002W	PDH1	Yes	Yes	Up	small	Mitochondria	2
YPR047W	MSF1	Yes	Yes	Up	small	Mitochondria	2
YNR001C	CIT1	Yes	Yes	Up	small	Mitochondria	2
YBR230C	OM14	Yes	Yes	Up	small	Mitochondria	2
YMR059W	SEN15	Yes	Yes	Up	small	Mitochondria	2
YGR028W	MSP1	Yes	Yes	up	small	Mitochondria	2
YGR255C	COQ6	Yes	Yes	Up	large	Mitochondria	2
YML110C	COQ5	Yes	yes	Up	large	Mitochondria	2
YHR120W	MSH1	yes	Yes	unchanged		Mitochondria	2
YKL029C	MAE1	Yes	Yes	unchanged		Mitochondria	2
YOR356W	CIR2	Yes	Yes	unchanged		Mitochondria	2
YHL038C	CBP2	Yes	Yes	unchanged		Mitochondria	2
YOR147W	MDM32	Yes	Yes	unchanged		Mitochondria	2
YLR289W	GUF1	Yes	Yes	unchanged		Mitochondria	2
YKL155C	RSM22	Yes	Yes	unchanged		Mitochondria	2
YBL015W	ACH1	Yes	Yes	unchanged		Mitochondria	2
YER073W	ALD5	Yes	Yes	unchanged		Mitochondria	2
YDR036C	EHD3	Yes	Yes	unchanged		Mitochondria	2
YJR122W	CAF17	Yes	Yes	unchanged		Mitochondria	2
YPL072W	UBP16	Yes	Yes	unchanged		Mitochondria	2
YBL098W	BNA4	Yes	Yes	unchanged		Mitochondria	2
YGL219C	MDM34	Yes	Yes	unchanged		Mitochondria	2
YPR125W	YLH47	Yes	Yes	unchanged		Mitochondria	2
YKL027W	TCD2	Yes	Yes	unchanged		Mitochondria	2
YGR012W	MCY1	Yes	Yes	unchanged		Mitochondria	2
YHR162W	MPC2	Yes	Yes	unchanged		Mitochondria	2
YLL001W	DNM1	Yes	Yes	unchanged		Mitochondria	2
YNL121C	TOM70	Yes	Yes	unchanged		Mitochondria	2
YHR117W	TOM71	Yes	Yes	unchanged		Mitochondria	2
YGR082W	TOM20	Yes	Yes	unchanged		Mitochondria	2
YHR003C	TCD1	Yes	Yes	down	small	Mitochondria	2
YGR049W	SCM4	Yes	Yes	down	small	Mitochondria	2
YBR179C	FZO1	Yes	Yes	down	small	Mitochondria	2
YAL010C	MDM10	Yes	Yes	down	small	Mitochondria	2
YOL009C	MDM12	Yes	Yes	down	small	Mitochondria	2
YNL070W	TOM7	Yes	Yes	down	small	Mitochondria	2
YPL222W	FMP40	Yes	Yes	up	small	Cytoplasm	3
YIL155C	GUT2	Yes	Yes	up	small	Cytoplasm	3
YLR163C	MAS1	Yes	Yes	up	small	Cytoplasm	3
YJL060W	BNA3	Yes	Yes	Up	small	Cytoplasm	3
YDR019C	GCV1	Yes	Yes	Up	small	Cytoplasm	3
YPR004C	AIM45	Yes	Yes	Up	small	Cytoplasm	3
YNL315C	ATP11	Yes	Yes	Up	small	Cytoplasm	3
YGR021W	DPC29	Yes	yes	Up	small	Cytoplasm	3
YNL168C	FMP41	Yes	Yes	up	small	Cytoplasm	3
YDR305C	HNT2	Yes	Yes	Up	small	Cytoplasm	3
YLL027W	ISA1	Yes	Yes	Up	small	Cytoplasm	3
YLR168C	MSF1	Yes	Yes	Up	small	Cytoplasm	3
YNR018W	RCF2	Yes	Yes	up	small	Cytoplasm	3
YHR038W	RRF1	Yes	Yes	Up	small	Cytoplasm	3
YNL306W	MRPS18	Yes	Yes	up	small	Cytoplasm	3
YBL057C	PTH2	Yes	Yes	Up	small	Cytoplasm	3
YIR024C	GIF1	Yes	Yes	Up	small	Cytoplasm	3
YNL213C	RRG9	Yes	Yes	Up	small	Cytoplasm	3
YOR215C	AIM41	Yes	Yes	Up	small	Cytoplasm	3
YLR193C	UPS1	Yes	Yes	Up	small	Cytoplasm	3
YAL044C	GCV3	Yes	Yes	Up	small	Cytoplasm	3
YML078W	CPR3	Yes	Yes	Up	small	Cytoplasm	3
YCR071C	IMG2	Yes	Yes	Up	small	Cytoplasm	3
YIL051C	MMF1	Yes	Yes	Up	small	Cytoplasm	3
YGL226W	MTC3	Yes	Yes	up	small	Cytoplasm	3
YLR395C	COX8	Yes	Yes	Up	small	Cytoplasm	3
YOL096C	COQ3	Yes	Yes	Up	small	Cytoplasm	3
YGR174C	CBP4	Yes	Yes	Up	small	Cytoplasm	3
YDR178W	SDH4	Yes	Yes	Up	small	Cytoplasm	3
YLR356W	ATG33	Yes	Yes	Up	small	Cytoplasm	3
YOR136W	IDH2	Yes	Yes	Up	small	Cytoplasm	3
YKL150W	MCR1	Yes	yes	Up	large	Cytoplasm	3
YIL113W	SDP1	Yes	Yes	Up	large	Cytoplasm	3
YJL161W	FMP33	Yes	Yes	Up	large	Cytoplasm	3
YDL120W	YFH1	Yes	Yes	Up	large	Cytoplasm	3
YBR047W	FMP23	Yes	Yes	Up	large	Cytoplasm	3
YPL135W	ISU1	Yes	Yes	Up	large	Cytoplasm	3
YPR100W	MRPL51	Yes	Yes	Up	large	Cytoplasm	3
YGR243W	MPC3	Yes	Yes	Up	large	Cytoplasm	3
YML007C-A	MIN4	Yes	Yes	up	large	Cytoplasm	3
YDL130W-A	STF1	Yes	Yes	up	large	Cytoplasm	3
YHL018W	MCO14	Yes	Yes	unchanged		Cytoplasm	3
YML091C	RPM2	Yes	yes	unchanged		Cytoplasm	3
YMR189W	GCV2	yes	Yes	unchanged		Cytoplasm	3
YIL125W	KGD1	yes	Yes	unchanged		Cytoplasm	3
YOR022C	DDL1	Yes	Yes	unchanged		Cytoplasm	3
YDR194C	MSS116	Yes	Yes	unchanged		Cytoplasm	3
YPL104W	MSD1	Yes	Yes	unchanged		Cytoplasm	3
YER080W	AIM9	Yes	Yes	unchanged		Cytoplasm	3
YNL104C	LEU4	Yes	Yes	unchanged		Cytoplasm	3
YOL027C	MDM38	Yes	Yes	unchanged		Cytoplasm	3
YBL080C	PET112	Yes	Yes	unchanged		Cytoplasm	3
YOL033W	MSE1	Yes	Yes	unchanged		Cytoplasm	3
YMR023C	MSS1	Yes	Yes	unchanged		Cytoplasm	3
YDR061W		Yes	Yes	unchanged		Cytoplasm	3
YJR051W	OSM1	Yes	Yes	unchanged		Cytoplasm	3
YLR090W	XDJ1	Yes	Yes	unchanged		Cytoplasm	3
YHL021C	AIM17	Yes	Yes	unchanged		Cytoplasm	3
YJR062C	NTA1	Yes	Yes	unchanged		Cytoplasm	3
YCR079W	PTC6	Yes	Yes	unchanged		Cytoplasm	3
YMR062C	ECM40	Yes	Yes	unchanged		Cytoplasm	3
YIL094C	LYS12	Yes	Yes	unchanged		Cytoplasm	3
YDR065W	RRG1	Yes	Yes	unchanged		Cytoplasm	3
YOL042W	NGL1	Yes	Yes	unchanged		Cytoplasm	3
YNL005C	MRP7	Yes	Yes	unchanged		Cytoplasm	3
YIR021W	MRS1	Yes	Yes	unchanged		Cytoplasm	3
YNL037C	IDH1	Yes	Yes	unchanged		Cytoplasm	3
YHR106W	TRR2	Yes	Yes	unchanged		Cytoplasm	3
YJL208C	NUC1	Yes	Yes	unchanged		Cytoplasm	3
YPL069C	BTS1	Yes	Yes	unchanged		Cytoplasm	3
YGR231C	PHB2	Yes	Yes	unchanged		Cytoplasm	3
YLR439W	MRPL4	Yes	Yes	unchanged		Cytoplasm	3
YDR347W	MRP1	Yes	Yes	unchanged		Cytoplasm	3
YNL063W	MTQ1	Yes	Yes	unchanged		Cytoplasm	3
YLR312W-A	MRPL15	Yes	yes	unchanged		Cytoplasm	3
YLR351C	NIT3	Yes	yes	unchanged		Cytoplasm	3
YGL221C	NIF3	Yes	yes	unchanged		Cytoplasm	3
YLR201C	COQ9	Yes	Yes	unchanged		Cytoplasm	3
YJL043W		Yes	Yes	unchanged		Cytoplasm	3
YBL095W	MRX3	Yes	Yes	unchanged		Cytoplasm	3
YGR207C	CIR1	Yes	Yes	unchanged		Cytoplasm	3
YIL070C	MAM33	Yes	Yes	unchanged		Cytoplasm	3
YKL040C	NFU1	Yes	Yes	unchanged		Cytoplasm	3
YBL064C	PRX1	Yes	Yes	unchanged		Cytoplasm	3
YJR113C	RSM7	Yes	Yes	unchanged		Cytoplasm	3
YER153C	PET122	Yes	Yes	unchanged		Cytoplasm	3
YDL202W	MRPL11	Yes	Yes	unchanged		Cytoplasm	3
YER182W	FMP10	Yes	Yes	unchanged		Cytoplasm	3
YMR157C	AIM36	Yes	Yes	unchanged		Cytoplasm	3
YDR538W	PAD1	Yes	Yes	unchanged		Cytoplasm	3
YHR008C	SOD2	Yes	Yes	unchanged		Cytoplasm	3
YDR296W	MHR1	Yes	Yes	unchanged		Cytoplasm	3
YJL063C	MRPL8	Yes	Yes	unchanged		Cytoplasm	3
YBL059W	IAI11	Yes	Yes	unchanged		Cytoplasm	3
YOR236W	DFR1	Yes	Yes	unchanged		Cytoplasm	3
YFL046W	FMP32	Yes	Yes	unchanged		Cytoplasm	3
YIL157C	COA1	Yes	Yes	unchanged		Cytoplasm	3
YMR003W	AIM34	Yes	Yes	unchanged		Cytoplasm	3
YKR065C	PAM17	Yes	Yes	unchanged		Cytoplasm	3
YGL018C	JAC1	Yes	Yes	unchanged		Cytoplasm	3
YNL185C	MRPL19	Yes	Yes	unchanged		Cytoplasm	3
YOR150W	MRPL23	Yes	Yes	unchanged		Cytoplasm	3
YBR120C	CBP6	Yes	Yes	unchanged		Cytoplasm	3
YKL167C	MRP49	Yes	Yes	unchanged		Cytoplasm	3
YDR511W	ACN9	Yes	Yes	unchanged		Cytoplasm	3
YMR225C	MRPL44	Yes	Yes	unchanged		Cytoplasm	3
YKL170W	MRPL38	Yes	Yes	unchanged		Cytoplasm	3
YKL192C	ACP1	Yes	Yes	unchanged		Cytoplasm	3
YDL157C		Yes	Yes	unchanged		Cytoplasm	3
YLR295C	ATP14	Yes	Yes	unchanged		Cytoplasm	3
YPR098C	TMH18	Yes	Yes	unchanged		Cytoplasm	3
YDR377W	ATP17	Yes	Yes	unchanged		Cytoplasm	3
YLR390W	ECM19	Yes	Yes	unchanged		Cytoplasm	3
YJL166W	QCR8	Yes	Yes	unchanged		Cytoplasm	3
YNL211C	MRX7	Yes	Yes	unchanged		Cytoplasm	3
YMR302C	PRP12	Yes	Yes	unchanged		Cytoplasm	3
YBL099W	ATP1	Yes	Yes	unchanged		Cytoplasm	3
YER014W	HEM14	Yes	Yes	unchanged		Cytoplasm	3
YJR121W	ATP2	Yes	Yes	unchanged		Cytoplasm	3
YBL045C	COR1	Yes	Yes	unchanged		Cytoplasm	3
YER053C	PIC2	Yes	Yes	unchanged		Cytoplasm	3
YDL119C	HEM25	Yes	Yes	unchanged		Cytoplasm	3
YOR130C	ORT1	Yes	Yes	unchanged		Cytoplasm	3
YBR039W	ATP3	Yes	Yes	unchanged		Cytoplasm	3
YKR052C	MRS4	Yes	Yes	unchanged		Cytoplasm	3
YLR393W	ATP10	Yes	Yes	unchanged		Cytoplasm	3
YPL078C	ATP4	Yes	Yes	unchanged		Cytoplasm	3
YNL055C	POR1	Yes	Yes	unchanged		Cytoplasm	3
YAL039C	CYC3	Yes	Yes	unchanged		Cytoplasm	3
YDR298C	ATP5	Yes	Yes	unchanged		Cytoplasm	3
YGL187C	COX4	Yes	Yes	unchanged		Cytoplasm	3
YNL328C	MDJ2	Yes	Yes	unchanged		Cytoplasm	3
YIL111W	COX5B	Yes	Yes	unchanged		Cytoplasm	3
YMR256C	COX7	Yes	Yes	unchanged		Cytoplasm	3
YML081C-A	ATP18	Yes	Yes	unchanged		Cytoplasm	3
YOL077W-A	ATP19	Yes	Yes	unchanged		Cytoplasm	3
YDL066W	IDP1	Yes	Yes	down	small	Cytoplasm	3
YKL195W	MIA40	Yes	Yes	down	small	Cytoplasm	3
YCL064C	CHA1	Yes	Yes	down	small	Cytoplasm	3
YMR083W	ADH3	Yes	Yes	down	small	Cytoplasm	3
YIL077C	EAT1	Yes	Yes	down	small	Cytoplasm	3
YDR116C	MRPL1	Yes	yes	down	small	Cytoplasm	3
YHR189W	PTH1	Yes	Yes	down	small	Cytoplasm	3
YCR003W	MRPL32	Yes	Yes	down	small	Cytoplasm	3
YPR067W	ISA2	Yes	Yes	down	small	Cytoplasm	3
YCR028C-A	RIM1	Yes	Yes	down	small	Cytoplasm	3
YOR226C	ISU2	Yes	Yes	down	small	Cytoplasm	3
YDR115W	MRX14	Yes	Yes	down	small	Cytoplasm	3
YLR204W	QRI5	Yes	Yes	down	small	Cytoplasm	3
YDR322C-A	TIM11	Yes	Yes	down	small	Cytoplasm	3
YEL006W	YEA6	Yes	Yes	down	small	Cytoplasm	3
YPR191W	QCR2	Yes	Yes	down	small	Cytoplasm	3
YPR020W	ATP20	Yes	Yes	down	small	Cytoplasm	3
YPL271W	ATP15	Yes	Yes	down	small	Cytoplasm	3
YPR011C		Yes	Yes	down	large	Cytoplasm	3
YBR026C	ETR1	Yes	No	Up	large	Cytoplasm	3
YKR049C	FMP46	Yes	No	Up	large	Cytoplasm	3
YLR346C	CIS1	Yes	No	Up	large	Cytoplasm	3
YIL136W	OM45	Yes	Yes	Up	large	ER	4
YML086C	ALO1	Yes	Yes	unchanged		ER	4
YLR142W	PUT1	Yes	Yes	unchanged		ER	4
YOR187W	TUF1	Yes	Yes	unchanged		ER	4
YGR235C	MIC26	Yes	Yes	unchanged		ER	4
YJL104W	MIA1	Yes	Yes	unchanged		ER	4
YLR348C	DIC1	Yes	Yes	unchanged		ER	4
YNR017W	MAS6	Yes	Yes	unchanged		ER	4
YER154W	OXA1	Yes	Yes	down	small	ER	4
YKL120W	OAC1	Yes	Yes	down	small	ER	4
YJR077C	MIR1	Yes	Yes	down	small	ER	4
YGR183C	QCR9	Yes	Yes	down	small	ER	4
YPL029W	SUV3	Yes	Yes	down	small	Reduced abundance	5
YGL107C	RMD9	Yes	Yes	down	small	Reduced abundance	5
YNL073W	MSK1	Yes	Yes	down	small	Reduced abundance	5
YBR227C	MCX1	Yes	Yes	down	small	Reduced abundance	5
YKL106W	AAT1	Yes	Yes	down	small	Reduced abundance	5
YOR221C	MCT1	Yes	Yes	down	small	Reduced abundance	5
YKR070W		Yes	Yes	down	small	Reduced abundance	5
YGR084C	MRP13	Yes	Yes	down	small	Reduced abundance	5
YDR175C	RSM24	Yes	Yes	down	small	Reduced abundance	5
YLR091W	GEP5	Yes	Yes	down	small	Reduced abundance	5
YBR251W	MRPS5	Yes	Yes	down	small	Reduced abundance	5
YNL252C	MRPL17	Yes	yes	down	small	Reduced abundance	5
YKL055C	OAR1	Yes	yes	down	small	Reduced abundance	5
YDR337W	MRPS28	Yes	yes	down	small	Reduced abundance	5
YKR006C	MRPL13	Yes	yes	down	small	Reduced abundance	5
YGR132C	PHB1	Yes	yes	down	small	Reduced abundance	5
YJR101W	RSM26	Yes	Yes	down	small	Reduced abundance	5
YIL093C	RSM25	Yes	Yes	down	small	Reduced abundance	5
YOR004W	UTP23	Yes	Yes	down	small	Reduced abundance	5
YJL096W	MRPL49	Yes	Yes	down	small	Reduced abundance	5
YBL038W	MRPL16	Yes	Yes	down	small	Reduced abundance	5
YOR286W	RDL2	Yes	Yes	down	small	Reduced abundance	5
YGL080W	MPC1	Yes	Yes	down	small	Reduced abundance	5
YHR001W-A	QCR10	Yes	Yes	down	small	Reduced abundance	5
YER048W-A	ISD11	Yes	Yes	down	small	Reduced abundance	5
YLR188W	MDL1	Yes	Yes	down	small	Reduced abundance	5
YJL054W	TIM54	Yes	Yes	down	small	Reduced abundance	5
YGL129C	RSM23	Yes	Yes	down	small	Reduced abundance	5
YGR257C	MTM1	Yes	Yes	down	small	Reduced abundance	5
YBR037C	SCO1	Yes	Yes	down	small	Reduced abundance	5
YOR065W	CYT1	Yes	Yes	down	small	Reduced abundance	5
YKL016C	ATP7	Yes	Yes	down	small	Reduced abundance	5
YHR051W	COX6	Yes	Yes	down	small	Reduced abundance	5
YOR330C	MIP1	yes	Yes	down	large	Reduced abundance	5
YBR084W	MIS1	yes	Yes	down	large	Reduced abundance	5
YPL040C	ISM1	yes	Yes	down	large	Reduced abundance	5
YNL256W	FOL1	Yes	yes	down	large	Reduced abundance	5
YJL200C	ACO2	yes	Yes	down	large	Reduced abundance	5
YKL134C	OCT1	Yes	Yes	down	large	Reduced abundance	5
YLR072W	LAM6	Yes	Yes	down	large	Reduced abundance	5
YBR238C		Yes	Yes	down	large	Reduced abundance	5
YOR354C	MSC6	Yes	Yes	down	large	Reduced abundance	5
YDR234W	LYS4	Yes	Yes	down	large	Reduced abundance	5
YLR369W	SSQ1	Yes	Yes	down	large	Reduced abundance	5
YKR036C	CAF4	Yes	Yes	down	large	Reduced abundance	5
YOR108W	LEU9	Yes	Yes	down	large	Reduced abundance	5
YMR098C	ATP25	Yes	Yes	down	large	Reduced abundance	5
YLR253W	MCP2	Yes	Yes	down	large	Reduced abundance	5
YHR037W	PUT2	Yes	Yes	down	large	Reduced abundance	5
YMR282C	AEP2	Yes	Yes	down	large	Reduced abundance	5
YOR205C	GEP3	Yes	Yes	down	large	Reduced abundance	5
YER086W	ILV1	Yes	Yes	down	large	Reduced abundance	5
YPR006C	ICL2	Yes	Yes	down	large	Reduced abundance	5
YBR263W	SHM1	Yes	Yes	down	large	Reduced abundance	5
YJL071W	ARG2	Yes	Yes	down	large	Reduced abundance	5
YLR259C	HSP60	Yes	Yes	down	large	Reduced abundance	5
YMR145C	NDE1	Yes	Yes	down	large	Reduced abundance	5
YDR232W	HEM1	Yes	Yes	down	large	Reduced abundance	5
YPL109C	MCO76	Yes	Yes	down	large	Reduced abundance	5
YMR064W	AEP1	Yes	Yes	down	large	Reduced abundance	5
YGL119W	ABC1	Yes	Yes	down	large	Reduced abundance	5
YER078C	ICP55	Yes	Yes	down	large	Reduced abundance	5
YMR115W	MGR3	Yes	Yes	down	large	Reduced abundance	5
YEL052W	AFG1	Yes	Yes	down	large	Reduced abundance	5
YOR374W	ALD4	Yes	Yes	down	large	Reduced abundance	5
YLR121C	YPS3	Yes	Yes	down	large	Reduced abundance	5
YNL071W	LAT1	Yes	Yes	down	large	Reduced abundance	5
YPL097W	MSY1	Yes	Yes	down	large	Reduced abundance	5
YCR024C	PMP1	Yes	Yes	down	large	Reduced abundance	5
YER141W	COX15	Yes	Yes	down	large	Reduced abundance	5
YHR024C	MAS2	Yes	Yes	down	large	Reduced abundance	5
YCL017C	NFS1	Yes	Yes	down	large	Reduced abundance	5
YDR514C		Yes	Yes	down	large	Reduced abundance	5
YFL027C	GYP8	Yes	Yes	down	large	Reduced abundance	5
YPL262W	FUM1	Yes	Yes	down	large	Reduced abundance	5
YNL137C	NAM9	Yes	Yes	down	large	Reduced abundance	5
YDR219C	MFB1	Yes	Yes	down	large	Reduced abundance	5
YPL063W	TIM50	Yes	Yes	down	large	Reduced abundance	5
YDR316W	OMS1	Yes	Yes	down	large	Reduced abundance	5
YHR011W	DIA4	Yes	Yes	down	large	Reduced abundance	5
YDL027C	MRX9	Yes	Yes	down	large	Reduced abundance	5
YLR203C	MSS51	Yes	Yes	down	large	Reduced abundance	5
YCL044C	MGR1	Yes	Yes	down	large	Reduced abundance	5
YDL033C	SLM3	Yes	Yes	down	large	Reduced abundance	5
YNR052C	POP2	Yes	Yes	down	large	Reduced abundance	5
YPL168W	MRX4	Yes	Yes	down	large	Reduced abundance	5
YOR196C	LIP5	Yes	Yes	down	large	Reduced abundance	5
YOR201C	PET56	Yes	Yes	down	large	Reduced abundance	5
YGR193C	PDX1	Yes	Yes	down	large	Reduced abundance	5
YPL188W	POS5	Yes	Yes	down	large	Reduced abundance	5
YGL143C	MRF1	Yes	Yes	down	large	Reduced abundance	5
YPL060W	LPE10	Yes	Yes	down	large	Reduced abundance	5
YDL104C	QRI7	Yes	Yes	down	large	Reduced abundance	5
YMR024W	MRPL3	Yes	Yes	down	large	Reduced abundance	5
YDR268W	MSW1	Yes	Yes	down	large	Reduced abundance	5
YHL004W	MRP4	Yes	Yes	down	large	Reduced abundance	5
YGR112W	SHY1	Yes	Yes	down	large	Reduced abundance	5
YIL042C	PKP1	Yes	Yes	down	large	Reduced abundance	5
YMR097C	MTG1	Yes	Yes	down	large	Reduced abundance	5
YKR066C	CCP1	Yes	Yes	down	large	Reduced abundance	5
YDR322W	MRPL35	Yes	Yes	down	large	Reduced abundance	5
YGR165W	MRPS35	Yes	Yes	down	large	Reduced abundance	5
YHR199C	AIM46	Yes	Yes	down	large	Reduced abundance	5
YKR087C	OMA1	Yes	Yes	down	large	Reduced abundance	5
YNL177C	MRPL22	Yes	yes	down	large	Reduced abundance	5
YPR061C	JID1	Yes	yes	down	large	Reduced abundance	5
YGR222W	PET54	Yes	yes	down	large	Reduced abundance	5
YHR067W	RMD12	Yes	yes	down	large	Reduced abundance	5
YLR290C	COQ11	Yes	yes	down	large	Reduced abundance	5
YGL057C	GEP7	Yes	yes	down	large	Reduced abundance	5
YPR116W	RRG8	Yes	yes	down	large	Reduced abundance	5
YGR147C	NAT2	Yes	yes	down	large	Reduced abundance	5
YPR134W	MSS18	Yes	Yes	down	large	Reduced abundance	5
YGL085W	LCL3	Yes	Yes	down	large	Reduced abundance	5
YGR220C	MRPL9	Yes	Yes	down	large	Reduced abundance	5
YKL208W	CBT1	Yes	Yes	down	large	Reduced abundance	5
YDR405W	MRP20	Yes	Yes	down	large	Reduced abundance	5
YNR040W	DPI29	Yes	Yes	down	large	Reduced abundance	5
YJL066C	MPM1	Yes	Yes	down	large	Reduced abundance	5
YOR305W	RRG7	Yes	Yes	down	large	Reduced abundance	5
YPL107W	DPC25	Yes	Yes	down	large	Reduced abundance	5
YNL100W	IMC27	Yes	Yes	down	large	Reduced abundance	5
YGR033C	Tim21	Yes	Yes	down	large	Reduced abundance	5
YDR231C	COX20	Yes	Yes	down	large	Reduced abundance	5
YAL008W	FUN14	Yes	Yes	down	large	Reduced abundance	5
YPL252C	YAH1	Yes	Yes	down	large	Reduced abundance	5
YGR102C	GTF1	Yes	Yes	down	large	Reduced abundance	5
YCR046C	IMG1	Yes	Yes	down	large	Reduced abundance	5
YIL098C	FMC1	Yes	Yes	down	large	Reduced abundance	5
YOL071W	EMI5	Yes	Yes	down	large	Reduced abundance	5
YGR076C	MRPL25	Yes	Yes	down	large	Reduced abundance	5
YML030W	RCF1	Yes	Yes	down	large	Reduced abundance	5
YPL059W	GRX5	Yes	Yes	down	large	Reduced abundance	5
YBR269C	SDH8	Yes	Yes	down	large	Reduced abundance	5
YMR252C	MLO1	Yes	Yes	down	large	Reduced abundance	5
YNR022C	MRPL50	Yes	Yes	down	large	Reduced abundance	5
YDR462W	MRPL28	Yes	Yes	down	large	Reduced abundance	5
YHR059W	FYV4	Yes	Yes	down	large	Reduced abundance	5
YBR282W	MRPL27	Yes	Yes	down	large	Reduced abundance	5
YKL138C	MRPL31	Yes	Yes	down	large	Reduced abundance	5
YPL013C	MRPS16	Yes	Yes	down	large	Reduced abundance	5
YBR268W	MRPL37	Yes	Yes	down	large	Reduced abundance	5
YBR262C	MIC12	Yes	Yes	down	large	Reduced abundance	5
YFR049W	YMR31	Yes	Yes	down	large	Reduced abundance	5
YOL150C		Yes	Yes	down	large	Reduced abundance	5
YPL183W-A	GON5	Yes	Yes	down	large	Reduced abundance	5
YML009C	MRPL39	Yes	Yes	down	large	Reduced abundance	5
YJL062W-A	COA3	Yes	Yes	down	large	Reduced abundance	5
YOR017W	PET127	Yes	Yes	down	large	Reduced abundance	5
YPL270W	MDL2	Yes	Yes	down	large	Reduced abundance	5
YER017C	AFG3	Yes	Yes	down	large	Reduced abundance	5
YMR301C	ATM1	Yes	Yes	down	large	Reduced abundance	5
YPR024W	YME1	Yes	Yes	down	large	Reduced abundance	5
YLR139C	SLS1	Yes	Yes	down	large	Reduced abundance	5
YJL112W	MDV1	Yes	Yes	down	large	Reduced abundance	5
YMR089C	YTA12	Yes	Yes	down	large	Reduced abundance	5
YBR003W	COQ1	Yes	Yes	down	large	Reduced abundance	5
YNL169C	PSD1	Yes	Yes	down	large	Reduced abundance	5
YDR376W	ARH1	Yes	Yes	down	large	Reduced abundance	5
YMR177W	MMT1	Yes	Yes	down	large	Reduced abundance	5
YOR334W	MRS2	Yes	Yes	down	large	Reduced abundance	5
YOR266W	PNT1	Yes	Yes	down	large	Reduced abundance	5
YMR060C	TOM37	Yes	Yes	down	large	Reduced abundance	5
YNR041C	COQ2	Yes	Yes	down	large	Reduced abundance	5
YOR271C	FSF1	Yes	Yes	down	large	Reduced abundance	5
YMR166C	MME1	Yes	Yes	down	large	Reduced abundance	5
YOR037W	CYC2	Yes	Yes	down	large	Reduced abundance	5
YBR104W	YMC2	Yes	Yes	down	large	Reduced abundance	5
YMR241W	YHM2	Yes	Yes	down	large	Reduced abundance	5
YIL114C	POR2	Yes	Yes	down	large	Reduced abundance	5
YBR085W	AAC3	Yes	Yes	down	large	Reduced abundance	5
YGR062C	COX18	Yes	Yes	down	large	Reduced abundance	5
YPL134C	ODC1	Yes	Yes	down	large	Reduced abundance	5
YBR291C	CTP1	Yes	Yes	down	large	Reduced abundance	5
YNL003C	PET8	Yes	Yes	down	large	Reduced abundance	5
YMR056C	AAC1	Yes	Yes	down	large	Reduced abundance	5
YBR185C	MBA1	Yes	Yes	down	large	Reduced abundance	5
YJL133W	MRS3	Yes	Yes	down	large	Reduced abundance	5
YOR297C	TIM18	Yes	Yes	down	large	Reduced abundance	5
YER170W	ADK2	Yes	Yes	down	large	Reduced abundance	5
YEL024W	RIP1	Yes	Yes	down	large	Reduced abundance	5
YNL052W	COX5A	Yes	Yes	down	large	Reduced abundance	5
YML129C	COX14	Yes	Yes	down	large	Reduced abundance	5
YLR239C	LIP2	Yes	Yes	down	large	Reduced abundance	5
YDR204W	COQ4	Yes	Yes	down	large	Reduced abundance	5
YPL091W	GLR1	Yes	Yes	up	small	Other	Other
YFR011C	MIC19	Yes	Yes	Up	small	Other	Other
YGR215W	RSM27	Yes	Yes	up	small	Other	Other
YHR198C	AIM18	Yes	Yes	up	large	Other	Other
YPR155C	NCA2	Yes	Yes	unchanged		Other	Other
YGR171C	MSM1	Yes	Yes	unchanged		Other	Other
YKR016W	MIC60	Yes	Yes	unchanged		Other	Other
YJR080C	AIM24	Yes	Yes	unchanged		Other	Other
YNL284C	MRPL10	Yes	Yes	unchanged		Other	Other
YDR493W	MZM1	Yes	Yes	unchanged		Other	Other
YFL016C	MDJ1	Yes	Yes	unchanged		Other	Other
YIL022W	TIM44	Yes	Yes	unchanged		Other	Other
YPL215W	CBP3	Yes	Yes	unchanged		Other	Other
YJL209W	CBP1	Yes	Yes	down	small	Other	Other
YNL122C		Yes	Yes	down	small	Other	Other
YGR046W	TAM41	Yes	Yes	down	large	Other	Other
YGR286C	BIO2	Yes	Yes	down	large	Other	Other
YGL068W	MNP1	Yes	Yes	down	large	Other	Other
YDR375C	BCS1	Yes	Yes	down	large	Other	Other
YNL083W	SAL1	Yes	Yes			Not scoreable	N/A
YKL157W	APE2	No	Yes			Not scoreable	N/A
YDR430C	CYM1	No	Yes			Not scoreable	N/A
YNL239W	LAP3	No	Yes			Not scoreable	N/A
YFR024C-A	LSB3	No	Yes			Not scoreable	N/A
YFR044C	DUG1	No	Yes			Not scoreable	N/A
YHR083W	SAM35	No	Yes			Not scoreable	N/A
YGR015C		No	Yes			Not scoreable	N/A
YNL310C	ZIM17	No	Yes			Not scoreable	N/A
YDR041W	RSM10	No	Yes			Not scoreable	N/A
YGR096W	TPC1	No	Yes			Not scoreable	N/A
YHR155W	LAM1	yes	no			Not scoreable	N/A
YIL031W	ULP2	yes	No			Not scoreable	N/A
YMR287C	MSU1	yes	no			Not scoreable	N/A
YGR150C	CCM1	yes	No			Not scoreable	N/A
YAL056W	GPB2	yes	No			Not scoreable	N/A
YER069W	ARG5,6	yes	No			Not scoreable	N/A
YMR066W	SOV1	yes	No			Not scoreable	N/A
YLR382C	NAM2	yes	No			Not scoreable	N/A
YJL102W	MEF2	yes	No			Not scoreable	N/A
YLR069C	MEF1	yes	No			Not scoreable	N/A
YBR001C	NTH2	Yes	No			Not scoreable	N/A
YHL032C	GUT1	Yes	No			Not scoreable	N/A
YDR332W	IRC3	Yes	No			Not scoreable	N/A
YOR350C	MNE1	Yes	No			Not scoreable	N/A
YER077C	MRX1	Yes	No			Not scoreable	N/A
YBR163W	DEM1	Yes	No			Not scoreable	N/A
YPL005W	AEP3	Yes	No			Not scoreable	N/A
YJR003C	MRX12	Yes	No			Not scoreable	N/A
YDL048C	STP4	Yes	No			Not scoreable	N/A
YPR001W	CIT3	Yes	No			Not scoreable	N/A
YGL256W	ADH4	Yes	No			Not scoreable	N/A
YMR293C	HER2	Yes	No			Not scoreable	N/A
YDL044C	MTF2	Yes	No			Not scoreable	N/A
YHL014C	YLF2	Yes	No			Not scoreable	N/A
YKL162C		Yes	No			Not scoreable	N/A
YJL147C	SMT1	Yes	No			Not scoreable	N/A
YBL013W	FMT1	Yes	No			Not scoreable	N/A
YOL043C	NTG2	Yes	No			Not scoreable	N/A
YPR140W	TAZ1	Yes	No			Not scoreable	N/A
YDR197W	CBS2	Yes	No			Not scoreable	N/A
YJL131C	AIM23	Yes	No			Not scoreable	N/A
YMR267W	PPA2	Yes	No			Not scoreable	N/A
YBR176W	ECM31	Yes	No			Not scoreable	N/A
YLR283W		Yes	No			Not scoreable	N/A
YOR228C	MCP1	Yes	No			Not scoreable	N/A
YOR040W	GLO4	Yes	No			Not scoreable	N/A
YMR188C	MRPS17	Yes	No			Not scoreable	N/A
YGL211W	NCS6	Yes	No			Not scoreable	N/A
YBR122C	MRPL36	Yes	No			Not scoreable	N/A
YKR085C	MRPL20	Yes	No			Not scoreable	N/A
YBL090W	MRP21	Yes	No			Not scoreable	N/A
YLR281C	RSO55	Yes	No			Not scoreable	N/A
YIL087C	AIM19	Yes	No			Not scoreable	N/A
YKL003C	MRP17	Yes	no			Not scoreable	N/A
YCR083W	TRX3	Yes	No			Not scoreable	N/A
YNL081C	SWS2	Yes	No			Not scoreable	N/A
YDR079W	PET100	Yes	No			Not scoreable	N/A
YDL067C	COX9	Yes	No			Not scoreable	N/A
YDL045W-A	MRP10	Yes	No			Not scoreable	N/A
YDL181W	INH1	Yes	No			Not scoreable	N/A
YDR379C-A	SDH6	Yes	No			Not scoreable	N/A
YBL022C	PIM1	Yes	No			Not scoreable	N/A
YLR067C	PET309	Yes	No			Not scoreable	N/A
YMR257C	PET111	Yes	No			Not scoreable	N/A
YNR045W	PET494	Yes	No			Not scoreable	N/A
YDR185C	UPS3	Yes	No			Not scoreable	N/A
YMR207C	HFA1	No	No			Not scoreable	N/A
YOL023W	IFM1	No	No			Not scoreable	N/A
YDR474C		No	No			Not scoreable	N/A
YGL064C	MRH4	No	No			Not scoreable	N/A
YER061C	CEM1	No	No			Not scoreable	N/A
YDR125C	ECM18	No	No			Not scoreable	N/A
YGL059W	PKP2	No	No			Not scoreable	N/A
YLR105C	SEN2	No	No			Not scoreable	N/A
YKL011C	CCE1	No	No			Not scoreable	N/A
YDL107W	MSS2	No	No			Not scoreable	N/A
YGR101W	PCP1	No	No			Not scoreable	N/A
YNL198C		No	No			Not scoreable	N/A
YPL172C	COX10	No	No			Not scoreable	N/A
YDL142C	CRD1	No	No			Not scoreable	N/A
YDR529C	QCR7	No	No			Not scoreable	N/A
YOR045W	TOM6	No	No			Not scoreable	N/A
YGR031W	IMO32	No	No			Not scoreable	N/A
Total Screened	Total Scoreable	Total Class 1	Total Class 2	Total Class 3	Total Class 4	Total Class 5	Total Other
526	438	28	36	158	12	185	19
